# Supplementary material for: Metagenomic Characterization of the Microbiome and Resistome of Retail Ground Beef Products
Source: Front Microbiol. 2020 Nov 6;11:541972. doi: 10.3389/fmicb.2020.541972 (PMC7677504; doi:10.3389/fmicb.2020.541972)
Supplement: Supplementary File 1 — Excel spreadsheet containing metadata for the 16 microbiome samples and 32 resistome samples. [file Table_1.XLSX]

## Sheet: resistome_sample_metadata
ID	SampleID	Dilution sample	City	Treatment	Dilution	Packaging	Packaging_samples	Lean	Blinded_Store	Raw_paired_reads	QC_filtered_reads	nonhost_filtered_reads	SNP confirmed AMR counts	AMR class Richness	AMR class Shannon	AMR mech Richness	AMR mech Shannon
FC-112A_concatenated	Sample 1	Sample 1.1	Fort Collins	RWA	None	Vacuum	Vacuum(N=16)	90	Store6	38190379	36762458	28728	100	10	1.80366	16	2.32751
FC-112A1in2_concatenated	Sample 1	Sample 1.2	Fort Collins	RWA	Half	Vacuum	Vacuum(N=16)	90	Store6	8544874	8249150	5538	673	10	1.70745	18	2.17705
FC-113A_concatenated	Sample 2	Sample 2.1	Fort Collins	RWA	None	Vacuum	Vacuum(N=16)	90	Store2	34644683	33386392	167830	9628	11	0.749748	17	0.780158
FC-113A1in2_concatenated	Sample 2	Sample 2.2	Fort Collins	RWA	Half	Vacuum	Vacuum(N=16)	90	Store2	49990544	48466450	172974	3777	7	0.765861	12	0.801303
FC-122A_concatenated	Sample 3	Sample 3.1	Fort Collins	RWA	None	Vacuum	Vacuum(N=16)	85	Store4	42523674	41038940	98088	19089	9	0.0948818	18	0.114628
FC-122A1in2_concatenated	Sample 3	Sample 3.2	Fort Collins	RWA	Half	Vacuum	Vacuum(N=16)	85	Store4	59222209	57116177	146919	12514	9	0.0624125	14	0.0716644
FC-123A_concatenated	Sample 4	Sample 4.1	Fort Collins	RWA	None	Vacuum	Vacuum(N=16)	90	Store4	37062617	35657217	20149	80	7	1.55611	10	1.86282
FC-123A1in2_concatenated	Sample 4	Sample 4.2	Fort Collins	RWA	Half	Vacuum	Vacuum(N=16)	90	Store4	19036211	18357780	8595	271	9	1.66776	14	1.99751
FC-133A_concatenated	Sample 5	Sample 5.1	Fort Collins	RWA	None	Vacuum	Vacuum(N=16)	92	Store1	41617299	39968343	65852	628	7	0.393542	9	0.422364
FC-133A1in2_concatenated	Sample 5	Sample 5.2	Fort Collins	RWA	Half	Vacuum	Vacuum(N=16)	92	Store1	15200330	14620247	27615	6833	8	0.273815	15	0.302585
FC-134A_concatenated	Sample 6	Sample 6.1	Fort Collins	RWA	None	Vacuum	Vacuum(N=16)	80	Store1	46514396	44608097	37377	984	8	0.434205	14	0.523507
FC-134A1in2_concatenated	Sample 6	Sample 6.2	Fort Collins	RWA	Half	Vacuum	Vacuum(N=16)	80	Store1	34804270	33470715	52034	1161	7	0.3504	12	0.395017
FC-142A_concatenated	Sample 7	Sample 7.1	Fort Collins	RWA	None	Vacuum	Vacuum(N=16)	93	Store3	34983723	33538488	78496	5303	8	0.145408	14	0.192906
FC-142A1in2_concatenated	Sample 7	Sample 7.2	Fort Collins	RWA	Half	Vacuum	Vacuum(N=16)	93	Store3	41672381	40236202	81513	1342	7	0.174803	11	0.221355
FC-143A_concatenated	Sample 8	Sample 8.1	Fort Collins	RWA	None	Vacuum	Vacuum(N=16)	85	Store3	45442442	43529554	51204	627	6	0.577665	8	0.664925
FC-143A1in2_concatenated	Sample 8	Sample 8.2	Fort Collins	RWA	Half	Vacuum	Vacuum(N=16)	85	Store3	41210567	39588437	40161	448	5	0.449873	7	0.539213
FC-161A_concatenated	Sample 9	Sample 9.1	Fort Collins	CONV	None	Chub	Chub(N=8)	80	Store1	43515676	41896445	728548	51868	9	0.0410313	15	0.711519
FC-161A1in2_concatenated	Sample 9	Sample 9.2	Fort Collins	CONV	Half	Chub	Chub(N=8)	80	Store1	67058362	64579770	824877	34143	8	0.0332676	10	0.724126
FC-162A_concatenated	Sample 10	Sample 10.1	Fort Collins	CONV	None	Chub	Chub(N=8)	93	Store1	54399943	52389506	165437	2792	10	0.636914	20	1.09005
FC-162A1in2_concatenated	Sample 10	Sample 10.2	Fort Collins	CONV	Half	Chub	Chub(N=8)	93	Store1	50459468	48697965	126973	1619	10	0.532803	17	0.791354
FC-172A_concatenated	Sample 11	Sample 11.1	Fort Collins	CONV	None	TrayOverwrap	TrayOverwrap(N=6)	80	Store3	45710363	44090217	1410649	2147	8	0.659585	14	0.726083
FC-172A1in2_concatenated	Sample 11	Sample 11.2	Fort Collins	CONV	Half	TrayOverwrap	TrayOverwrap(N=6)	80	Store3	39790090	38407079	1104944	20120	10	0.316634	16	0.365594
FC-177A_concatenated	Sample 12	Sample 12.1	Fort Collins	CONV	None	TrayOverwrap	TrayOverwrap(N=6)	93	Store5	40915803	39211802	41483	10290	12	0.993876	23	1.57573
FC-177A1in2_concatenated	Sample 12	Sample 12.2	Fort Collins	CONV	Half	TrayOverwrap	TrayOverwrap(N=6)	93	Store5	54833376	52650008	45942	5686	14	0.962874	24	1.56004
FC-181A_concatenated	Sample 13	Sample 13.1	Fort Collins	CONV	None	StoreGrind	StoreGrind(N=2)	90	Store1	50492224	48832439	66376	266	8	1.25179	13	1.49662
FC-181A1in2_concatenated	Sample 13	Sample 13.2	Fort Collins	CONV	Half	StoreGrind	StoreGrind(N=2)	90	Store1	44527155	43105651	50912	135	8	1.55121	11	1.85318
FC-186A_concatenated	Sample 14	Sample 14.1	Fort Collins	CONV	None	Chub	Chub(N=8)	80	Store5	46960256	45204364	736031	30259	10	0.450745	18	0.950909
FC-186A1in2_concatenated	Sample 14	Sample 14.2	Fort Collins	CONV	Half	Chub	Chub(N=8)	80	Store5	54816543	52698955	1069355	25356	7	0.371593	15	0.76993
FC-195A_concatenated	Sample 15	Sample 15.1	Fort Collins	CONV	None	Chub	Chub(N=8)	85	Store5	48943119	47226073	197321	4722	7	0.241039	15	0.395048
FC-195A1in2_concatenated	Sample 15	Sample 15.2	Fort Collins	CONV	Half	Chub	Chub(N=8)	85	Store5	43918073	42408126	175310	10623	8	0.202951	16	0.43127
FC-199A_concatenated	Sample 16	Sample 16.1	Fort Collins	CONV	None	TrayOverwrap	TrayOverwrap(N=6)	93	Store3	33252253	31859552	144585	3088	11	1.04055	21	1.33482
FC-199A1in2_concatenated	Sample 16	Sample 16.2	Fort Collins	CONV	Half	TrayOverwrap	TrayOverwrap(N=6)	93	Store3	52680331	50601018	184951	1350	8	0.971564	14	1.11806

## Sheet: microbiome_sample_metadata
ID	Sample	City	Treatment	Packaging	Lean	Blinded Store	Raw paired reads	QC filtered reads	Microbiome mapped reads	microbiome domain Richness	microbiome domain Shannon	microbiome phylum Richness	microbiome phylum Shannon	microbiome class Richness	microbiome class Shannon	microbiome order Richness	microbiome order Shannon	microbiome family Richness	microbiome family Shannon	microbiome genus Richness	microbiome genus Shannon	microbiome species Richness	microbiome species Shannon
FC_112	Sample 1	Fort Collins	RWA	Vacuum	90	Store6	206239	191802	161683	3	0.0260001	28	1.1793	79	1.55815	124	1.83484	156	2.40597	194	2.10881	215	1.98467
FC_113	Sample 2	Fort Collins	RWA	Vacuum	90	Store2	202019	188456	168405	3	0.0454702	26	1.22531	73	1.58818	104	1.83743	137	2.40925	159	2.14348	184	2.052
FC_122	Sample 3	Fort Collins	RWA	Vacuum	85	Store4	213646	197900	175406	3	0.00138386	16	0.206974	41	0.256093	62	0.312437	82	0.9578	67	0.89045	62	0.865436
FC_123	Sample 4	Fort Collins	RWA	Vacuum	90	Store4	210004	184008	100804	3	0.00634088	39	1.16803	107	1.7865	168	2.28425	208	2.91721	287	2.64339	340	2.57306
FC_133	Sample 5	Fort Collins	RWA	Vacuum	92	Store1	212618	198432	183293	3	0.00178723	13	0.491416	28	0.60633	46	0.667941	71	1.41674	71	1.41319	74	1.35635
FC_134	Sample 6	Fort Collins	RWA	Vacuum	80	Store1	219822	198879	157092	1	0	10	0.2901	24	0.367247	44	0.513199	60	1.21248	54	1.40752	55	1.31185
FC_142	Sample 7	Fort Collins	RWA	Vacuum	93	Store3	187892	174760	152947	1	0	11	0.255691	23	0.317068	34	0.381225	50	1.21866	47	1.22932	51	1.11244
FC_143	Sample 8	Fort Collins	RWA	Vacuum	85	Store3	155859	143060	116075	3	0.00117891	18	0.488696	40	0.595662	63	0.786739	95	1.48565	83	1.43446	83	1.27362
FC_161	Sample 9	Fort Collins	CONV	Chub	80	Store1	180094	167597	157085	2	0.000226615	9	0.686201	23	0.831883	37	0.914153	48	1.25928	45	1.22113	46	1.20907
FC_162	Sample 10	Fort Collins	CONV	Chub	93	Store1	200365	188043	175864	3	0.000406753	23	0.775595	61	1.10618	94	1.32651	122	1.81476	123	1.64161	123	1.44532
FC_172	Sample 11	Fort Collins	CONV	TrayOverwrap	80	Store3	100939	94569	87476	1	0	11	0.465122	28	0.585475	44	0.733003	52	1.41532	49	1.33831	44	1.10376
FC_177	Sample 12	Fort Collins	CONV	TrayOverwrap	93	Store5	178300	162800	115442	3	0.00631292	25	1.088	67	1.67208	103	2.06699	143	2.64196	148	2.61006	163	2.73868
FC_181	Sample 13	Fort Collins	CONV	StoreGrind	90	Store1	216235	203920	187060	1	0	14	0.256592	35	0.41808	55	0.478857	79	1.46809	70	1.48477	74	1.31592
FC_186	Sample 14	Fort Collins	CONV	Chub	80	Store5	205446	192819	180667	1	0	25	0.869418	66	1.12881	98	1.32971	134	1.59721	138	1.43516	142	1.69416
FC_195	Sample 15	Fort Collins	CONV	Chub	85	Store5	207711	192730	186093	2	0.00291451	11	0.563076	17	0.635212	33	0.804989	50	1.06009	46	0.918093	48	1.71476
FC_199	Sample 16	Fort Collins	CONV	TrayOverwrap	93	Store3	213344	203177	191521	2	0.000356232	21	0.696462	46	0.978885	75	1.11925	106	1.51856	110	1.27525	113	1.27167
